# 1 Spatial simulation of co-designed land-cover change scenarios in New England: Alternative futures and their 2 consequences for conservation priorities

3 Jonathan R. Thompson<sup>1</sup>, Joshua Plisinski<sup>1</sup>, Kathy Fallon Lambert<sup>1,2</sup>, Matthew J. Duveneck<sup>1,3</sup>, Luca

4 Morreale<sup>1,4</sup>, Marissa McBride<sup>1,5</sup>, Meghan Graham MacLean<sup>1</sup>, Marissa Weis<sup>1</sup> and Lucy Lee<sup>1</sup>

5 <sup>1</sup>Harvard Forest, Harvard University, Petersham, MA

6 <sup>2</sup>Center for Climate, Health, and the Global Environment, Harvard TH Chan School of Public Health,  
7 Boston, MA

8 <sup>3</sup>New England Conservatory, Boston MA

9 <sup>4</sup>Boston University, Boston, MA

10 <sup>5</sup>Imperial College London, UK

11

12 **KEYWORDS:** Land cover change, scenarios, New England, Dinamica

## 13 **ABSTRACT:**

14 To help prepare for an uncertain future, planners and scientists often engage with stakeholders to co-  
15 design alternative scenarios of land-use change. Methods to translate the resulting qualitative scenarios  
16 into quantitative simulations that characterize the future landscape condition are needed to understand  
17 consequences of the scenarios while maintaining the legitimacy of the process. We use the New England  
18 Landscape Futures (NELF) project as a case study to demonstrate a transparent method for translating  
19 participatory scenarios to simulations of Land-Use and Land-Cover (LULC) change and for understanding  
20 the major drivers of land-use change and diversity of plausible scenarios and the consequences of  
21 alternative land-use pathways for conservation priorities. The NELF project co-designed four narrative  
22 scenarios that contrast with a *Recent Trends* scenario that projects a continuation of observed changes  
23 across the 18-million-hectare region during the past 20 years. Here, we (1) describe the process and  
24 utility of translating qualitative scenarios into spatial simulations using a dynamic cellular land change  
25 model; (2) evaluate the outcomes of the scenarios in terms of the differences in the LULC configuration  
26 relative to the *Recent Trends* scenario and to each other; (3) compare the fate of forests within key areas  
27 of concern to the stakeholders; and (4) describe how a user-inspired outreach tool was developed to  
28 make the simulations and analyses accessible to diverse users. The four alternative scenarios populate a  
29 quadrant of future conditions that crosses high to low natural resource planning and innovation with local  
30 to global socio-economic connectedness. The associated simulations are strongly divergent in terms of  
31 the amount of LULC change and the spatial pattern of change. Features of the simulations can be linked  
32 back to the original storylines. Among the scenarios there is a fivefold difference in the amount of high-  
33 density development, and a twofold difference in the amount of protected land. Overall, the rate of LULC  
34 change has a greater influence on forestlands of concern to the stakeholders than does the spatial  
35 configuration. The simulated scenarios have been integrated into an online mapping tool that was  
36 designed via a user-engagement process to meet the needs of diverse stakeholders who are interested  
37 the future of the land and in using future scenarios to guide land use planning and conservation priorities.

## 38 **INTRODUCTION:**

39 Scenario planning is a rigorous way of asking “*what if?*” and it can be a powerful tool for natural  
40 resource professionals preparing for the future of socio-ecological systems. In the context of land-use or  
41 regional planning, scenario development uses a structured process to integrate diverse modes of  
42 knowledge to create a shared understanding of how the future may unfold (MA 2005, Mahmoud et al.

43 2009, Wiebe et al. 2018). The resulting scenario narratives that emerge from participatory scenario  
44 planning describe alternative trajectories of landscape change that would logically emerge from different  
45 sets of assumptions (Thompson et al. 2012). Scenarios are not forecasts or predictions; instead, they are  
46 a way to explore multiple hypothetical futures in a way that recognizes the irreducible uncertainty and  
47 unpredictability of complex systems (Pedde et al. 2018).

48 Scientists are increasingly co-designing scenarios with stakeholders—i.e., groups of people who  
49 are both affected by and/or can affect decisions or outcomes (Voinov and Bousquet 2010, Reed et al.  
50 2013, McBride et al. 2017). Co-designing scenarios increases the range of viewpoints and expertise  
51 included in the process and, in turn, attempts to increase the relevance, credibility and salience of  
52 outcomes (sensu, Cash et al. 2003). Participatory land use scenario development is particularly useful in  
53 landscapes such as New England where landscape change is driven by the behaviors and decisions of  
54 hundreds of thousands of stakeholders that are not amenable to centralized planning or prediction. A  
55 land-use scenario co-design process typically results in a set of contrasting storylines that describe the  
56 way the future might unfold, based on specific assumptions about dominant social and ecological forces  
57 of change within a landscape (Ramírez and Selin 2014, McBride et al. 2017).

58 The utility of qualitative, co-designed scenarios can be enhanced by linking them to quantitative  
59 representations of future land-use change, as generated by a spatially explicit simulation model.  
60 However, translating between narrative scenario descriptions and quantitative models presents  
61 challenges and tradeoffs related to the treatment of uncertainty, the potential to accommodate  
62 stakeholders in the process, the resources required, and the compatibility with different types of  
63 simulation models (see reviews of these factors in: Mallampalli et al. 2016, Pedde et al. 2018). These  
64 challenges notwithstanding, variations on the “Story and Simulation” approach (sensu Alcamo 2008) to  
65 scenario planning are increasingly used in environmental planning and are the basis for many large-  
66 scale regional scenario assessments (MA 2005, Rounsevell et al. 2006, Thompson et al. 2014, 2016,  
67 Carpenter et al. 2015, Sohl et al. 2016, Kline et al. 2017).

68 Cellular land change models (LCM) have features that make them well suited to the translation of  
69 qualitative scenarios to spatial simulations (Brown et al. 2013, Dorning et al. 2015, Thompson et al. 2017).  
70 Cellular LCMs are phenomenologically driven, as opposed to process-driven, and are often used to  
71 project observed trends of land use and land cover (LULC) change forward in time. By projecting observed  
72 trends of LULC change, they operate with the implicit assumption that the future will be a continuation of  
73 the past (e.g., Thompson et al. 2017). These models quantify the rate of LULC change and the  
74 relationships between the location of observed LULC change (i.e., a change detection) and a suite of  
75 spatial predictor variables—e.g., patterns of existing development, proximity to city centers or roads,  
76 topography, demographics etc. Simulating these patterns into the future constitutes a “recent trends”  
77 scenario, which can be used as a baseline, against which alternative scenarios can be evaluated. Then, by  
78 adjusting LULC change rates and/or re-defining the strength or nature of the relationships between LULC  
79 changes and spatial predictor variables, modelers can systematically and transparently simulate  
80 alternative scenarios. Cellular LCMs can also incorporate feedbacks to LULC change and portray multiple  
81 interacting land uses. For example, on a simulated forested site, new land protection can prevent new  
82 residential development from occurring. New residential development in a simulation can also increase  
83 the probability that additional new development will occur in proximity to existing development. This  
84 dynamic modelling approach produces a realistic manifestation of LULC change by re-producing observed  
85 landscape patterns (Wilson et al. 2003). Finally, cellular LCMs are relatively straightforward to

86 understand and to describe to stakeholders, as compared with agent-based or other more  
87 computationally sophisticated approaches to land-use simulation (Brown et al 2013).

88

89 *New England Landscape Futures:*

90 Here we use the New England Landscape Futures (NELF) project as a case study to demonstrate  
91 the potential for translating participatory scenarios to simulations of LULC change and for understanding  
92 the consequences of alternative land-use pathways for conservation priorities. NELF is a multi-  
93 institutional, participatory scenario project with the overarching goal of building and evaluating scenarios  
94 that show how land-use choices and climate change could shape the landscape over the next 50 years.

95 The six-state, 18-million-hectare region has several characteristics that lend itself to participatory  
96 scenario planning (McBride et al. 2017). Seventy-five percent of New England forests are privately owned,  
97 including the nation's largest contiguous block of private commercial forestland (> 4 million ha) plus  
98 hundreds of thousands of family forest owners with small to mid-sized parcels totaling > 7 million  
99 hectares (Butler et al. 2016). It is among the most forested and most populated regions in the U.S.;  
100 average forest cover in the region exceeds 80% but ranges from 50% in Rhode Island to 90% in Maine  
101 (Figure 1). The future of these forests is in question. Since 1985, roughly 10,000 ha yr<sup>-1</sup> of forest have  
102 been lost to commercial, residential, and energy development, marking the reversal of a 150-year period  
103 of forest expansion in the region (Olofsson et al. 2016). Working to slow the rate of forest loss are a range  
104 of robust conservation initiatives that have, to date, permanently protected 23% of the region from  
105 development; half of this conservation land has been protected since 1990 (Foster et al. 2017, Sims et al.  
106 2019). Modern land protection in this region is primarily achieved by private land owners voluntarily  
107 placing conservation restrictions on their land. Likewise, development of forest or agricultural sites to  
108 residential or commercial uses is made primarily by individual private land owners. Thus, these individual  
109 choices are collectively determining the future of the shared landscape. There is no central decision-  
110 making authority for land use; instead, the condition of future landscape will be the product of countless  
111 independent landowner decisions and a conglomerate of local, regional, and state policies.

112

113

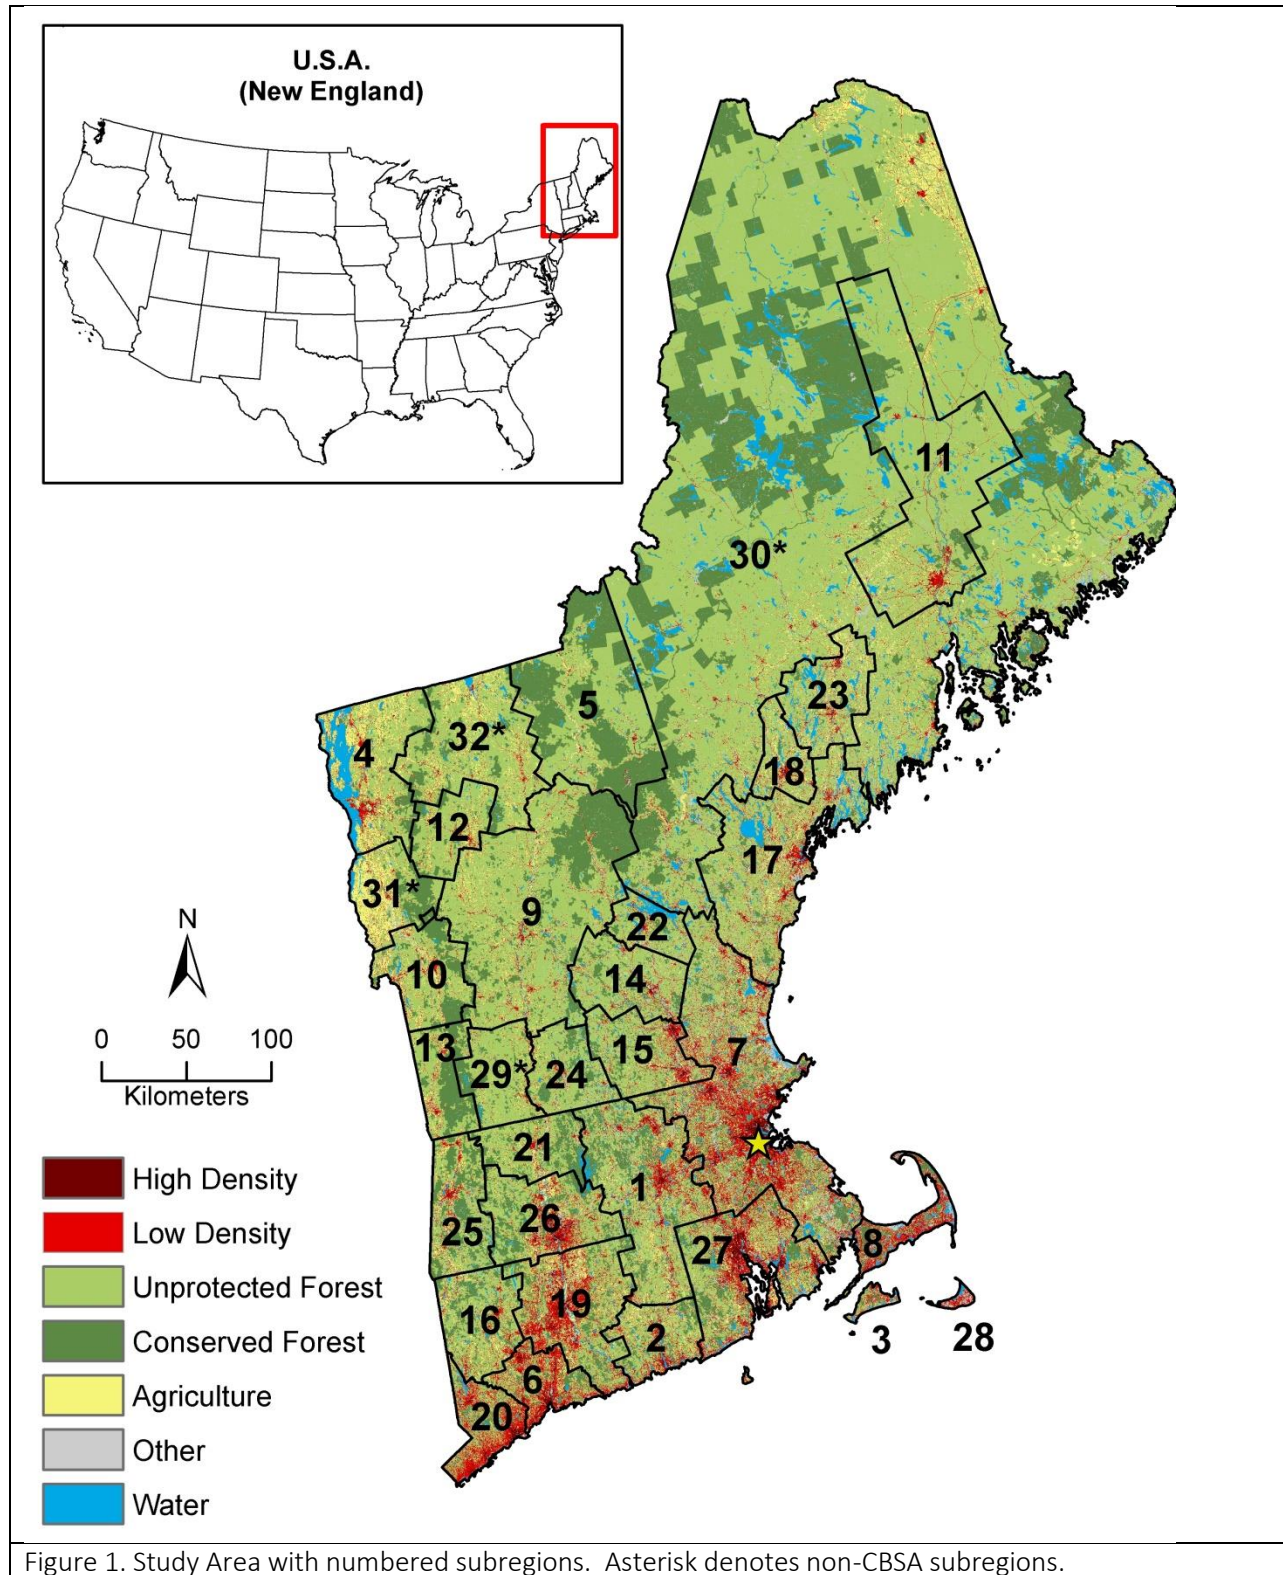

114

115

116

117

McBride et al. (2017) describe the participatory process through which the NELF project co-designed four divergent narrative scenarios that contrast with a *Recent Trends* scenario. In brief, four scenarios were co-designed through a structured scenario development process that engaged > 150

118 stakeholders and scientists from throughout the study region. Using the Intuitive Logics approach to  
119 scenario development popularized by Royal Dutch Shell/Global Business Network (Bradfield et al. 2005),  
120 the NELF project stakeholders envisioned opposing outcomes of two key drivers of land-use change that  
121 they identified as highly impactful and highly uncertain: socio-economic connectedness and natural  
122 resource planning and innovation. The process resulted in a matrix of four quadrants that encompassed  
123 four broad scenarios. Participants then added details about each scenario storyline in qualitative terms,  
124 which took the form of ~1000 word narratives (McBride et al. 2017) and are summarized in the Scenario  
125 Narratives (Table 1). Next, participants were presented with key features of the *Recent Trends* scenario  
126 and asked to describe how land use would differ in each of the alternative scenarios using semi-  
127 quantitative terms. We then adjusted model input parameters to reflect the characteristics of each of  
128 the four divergent scenarios. Finally, through a series of subsequent interactive webinars we worked with  
129 participants to refine these parameters to ensure the scenarios captured their intent.  
130

Table 1. Scenario Narratives

**Four visions of New England in 2060:**

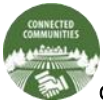

**Connected Communities** - This is the story of how a shift towards living 'local' and valuing regional self-sufficiency and local resource use increases the urgency to protect local resources.

The New England population has increased slowly over the past fifty years and most communities are coping with climate change by anchoring in place rather than relocating, making local culture and the use and protection of local resources increasingly important to governments and communities. New England has been less affected by climate change than many other regions of the U.S. in this scenario. Concerns about global unrest and the environmental impacts of global trade have led New Englanders to strengthen their local ties and become more self-reliant. These factors combine with heightened community interest and public policies to strengthen local economies and fuel burgeoning markets for local food, local wood, and local recreation.

DRIVERS: *High natural resource planning & innovation / Local socio-economic connectedness*

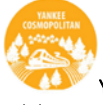

**Yankee Cosmopolitan** - This is the story of how we embrace change through experimentation and upfront investments. While environmental changes break records and urbanization continues to pressure natural systems, society responds with greater flexibility, ingenuity, and integration.

In this scenario, New England has experienced substantial population growth spurred by climate and economic migrants who are seeking areas less vulnerable to heat waves, drought, and sea-level rise. Most migrants are international but some have relocated from more climate-affected regions in the U.S. At the same time, a strong track record in research and technology has made New England a world leader in biotech and engineering, creating a large demand for skilled labor. The region's relative resilience to climate change and growing employment opportunities has made New England a major economic and population growth center of the U.S. Abundant forests remain a central part of New England's identity, and support increases in tourism, particularly in Vermont, Maine, and New Hampshire.

DRIVERS: *High natural resource planning & innovation / Global socio-economic connectedness*

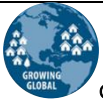

**Growing Global** - This is the story of an influx of climate change migrants seeking refuge in New England, and taking the region by surprise. New pressures on municipal services drive a trend towards privatization. Regional to national policies have promoted global trade but global agreements to address climate change have failed.

In this scenario, by 2060, a steady stream of migrants has driven up New England's population, with newcomers seeking to live in areas with few natural hazards, ample clean air and water, and low vulnerability to climate change. This influx of people has taken the region by surprise and local planning efforts have failed to keep pace with development. The region has experienced increasing privatization of municipal services as state and local governments struggle to keep up with the needs of the burgeoning

population. Trade barriers were lifted in the 2020s to counter economic stagnation and the volume of global trade has multiplied over the past 40 years as a result of increasing globalization. However, all attempts at global climate change negotiations and renewable energy commitments have failed in this globally divided world.

*DRIVERS: Low natural resource planning & innovation / Global socio-economic connectedness*

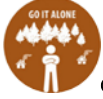

**Go It Alone** - This is the story of a region challenged by shrinking economic opportunities paired with increasing costs to meet basic needs, yet innovation is stagnant and new technologies are not rising to increase efficiency or create new opportunities. With local self-reliance and survival as the primary objectives, natural resource protections are rolled-back and communities turn heavily to extractive industries.

In this scenario, population growth in the region has remained fairly low and stable over the past 50 years as the lack of economic opportunity, high energy costs, and tightened national borders have deterred immigration and the relocation of people from within the U.S. to New England. The concurrent shrinking of national budgets and lack of global economic connections have left little leeway to deal with challenges such as high unemployment, demographic change, and climate resilience. Within New England this has resulted in the rolling back of natural resource protection policies and the drying up of investments in new technologies and ecosystem protections in response to a lack of regulatory drivers. Over the last 50 years, the region has seen the significant degradation of ecosystem services as a result of poor planning, increased pollution, and heavy extractive uses of local resources using conventional technologies.

*DRIVERS: Low natural resource planning & innovation / Local socio-economic connectedness*

- 131  
132 Here our objectives are to: 1) assess the utility and challenges of translating qualitative scenarios into  
133 spatial simulations using a cellular LCM; 2) evaluate the outcomes of the scenarios in terms of the  
134 differences in the LULC configuration relative to the *Recent Trends* scenario and to each other; 3)  
135 compare the fate the landscape in terms of development and conservation within key Impact Areas (i.e.,  
136 areas that have been identified as being important for conservation, wetland, flood, drinking water,  
137 farmland, and or wildlife management) (Figure 2). (4) make the scenarios and simulations available to  
138 New England land use stakeholders.

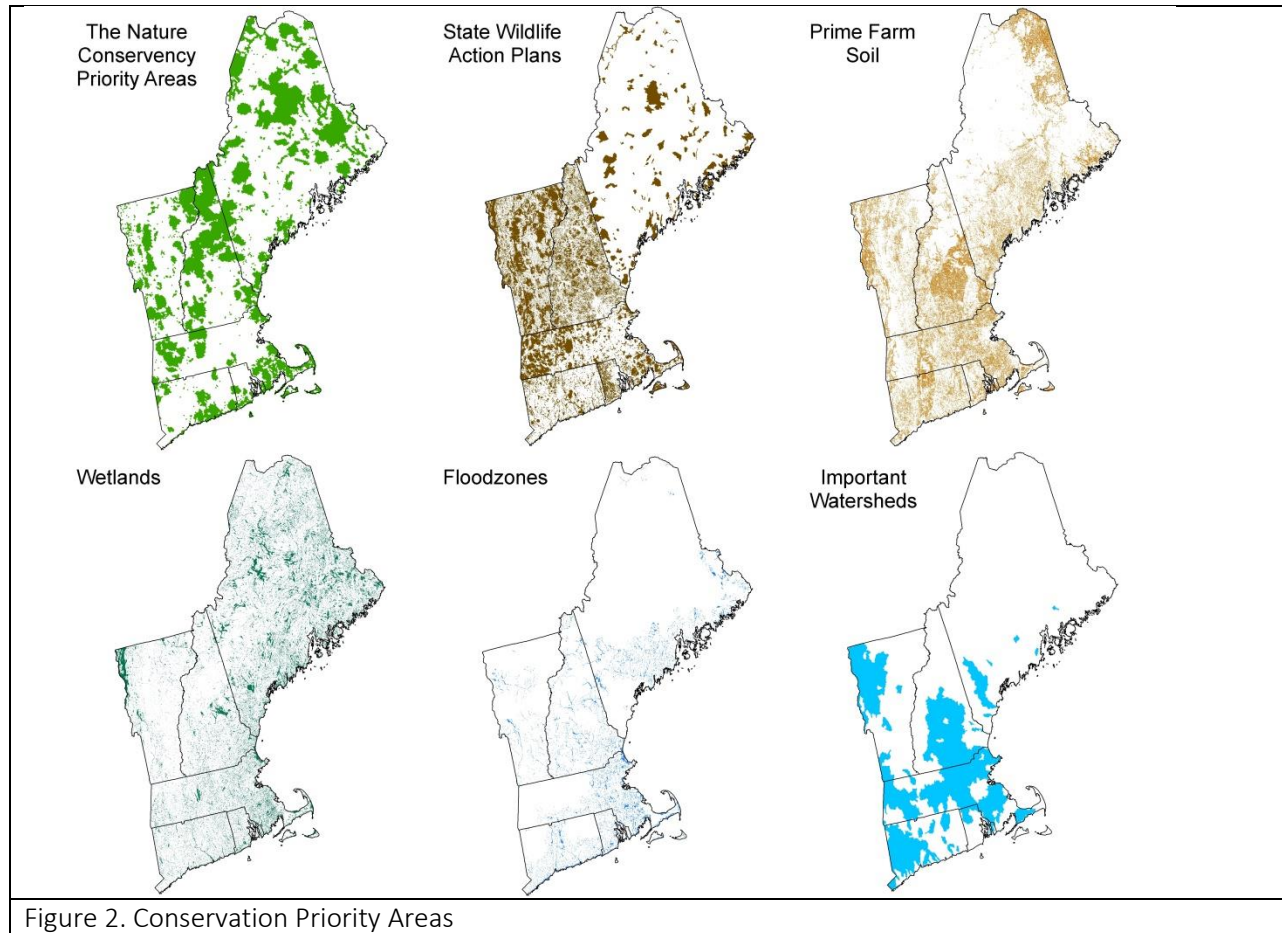

139

## 140 METHODS:

### 141 *Study Region:*

142 New England has a land area of 162,716 km<sup>2</sup> and includes the six most northeasterly states in the  
143 U.S.: Maine (80,068 km<sup>2</sup>), Vermont (23,923 km<sup>2</sup>), New Hampshire (23,247 km<sup>2</sup>), Massachusetts (20,269  
144 km<sup>2</sup>), Connecticut (12,509 km<sup>2</sup>) and Rhode Island (2,700 km<sup>2</sup>) (Figure 1). In 2010, the nominal starting  
145 date for the scenarios, 80.1% of the region was forest cover, 7.3% was low density development defined  
146 as development with <50% impervious cover, 1.3% was high density development defined as  
147 development with >50% impervious cover, and 6.4% was agricultural cover. These estimates were  
148 calculated from two sources: (1) the 2010 land cover map produced by Olofsson et al. (Olofsson et al.  
149 2016) applying the Continuous Change Detection and Classification (CCDC) algorithm to Landsat data for  
150 all of Massachusetts, New Hampshire, and Rhode Island, 93% of Vermont, 99% of Connecticut, and  
151 approximately 33% of Maine and (2) the 2011 National Land Cover Dataset (NLCD), also a Landsat  
152 product, for the remainder of New England (Homer et al. 2012). The CCDC and NLCD maps were  
153 reclassified to a common legend consisting of: High Density Development, Low Density Development,  
154 Forest, Agriculture, Water, and a composite "Other" class that consisted of landcovers such as bare rock  
155 and, wetlands which made up less than 5% of the landscape at year 2010 (Appendix I, table 1).

156 To account for regional variation in the patterns and drivers of land-cover change, we delineated  
157 32 subregions within New England (Figure 1) and independently fit the LCM to the rate and spatial

158 allocation of change within each subregion. The subregions primarily follow U.S. Census Bureau defined  
159 Core Base Statistical Areas (CBSA), which represent both Census Metropolitan and Micropolitan statistical  
160 areas ([www.census.gov](http://www.census.gov); accessed 4/20/2019). CBSAs are delineated to include a core area containing a  
161 substantial population nucleus, together with adjacent towns and communities that are integrated with  
162 the core in terms of economic and social factors. New England includes 27 CBSAs, however not all of New  
163 England is covered by a CBSA. Accordingly, we added five rural areas to fill the gaps, for a total of 32  
164 unique subregions. Among subregions, the Boston-Cambridge-Newton subregion (hereafter “Boston”) is,  
165 by far, the most populous; it contains the city of Boston, which is the region’s largest city, and in 2010  
166 accounted for 31% of the region’s total population.

167 *The simulation framework:*

168 We used the Dinamica Environment for Geoprocessing Objects (Dinamica EGO v.2.4.1) to  
169 simulate fifty years (2010 to 2060) of LULC change for each scenario, using ten-year time steps. Dinamica  
170 EGO is a spatially explicit LCM capable of multi-scale simulations that incorporate spatial feedbacks  
171 (Soares-Filho et al. 2002, 2009). The model has several attributes that make it well suited to simulating  
172 alternative LULC scenarios. Users prescribe the rate of each potential transition (Figure 3), the ratio of  
173 new vs. expansion patches, the mean and variance of new patch sizes, and patch shape complexity. The  
174 conditional probability of each transition is developed in relation to a suite of spatial predictor variables.  
175 When simulations are intended to project the pattern of LULC change observed in the past, Dinamica  
176 EGO employs a weights-of-evidence approach to set the transition probability for every pixel (Soares-  
177 Filho et al. 2009). This method is based on a modified form of Bayes theorem of conditional probability; it  
178 derives weights such that the effect of each spatial variable on a LULC transition is calculated  
179 independently. We used this approach to develop the spatial allocation of land-use to simulate a *Recent*  
180 *Trends* scenario in New England (Thompson et al. 2017) then modified the conditional probabilities to  
181 simulate the alternative scenarios (see below).



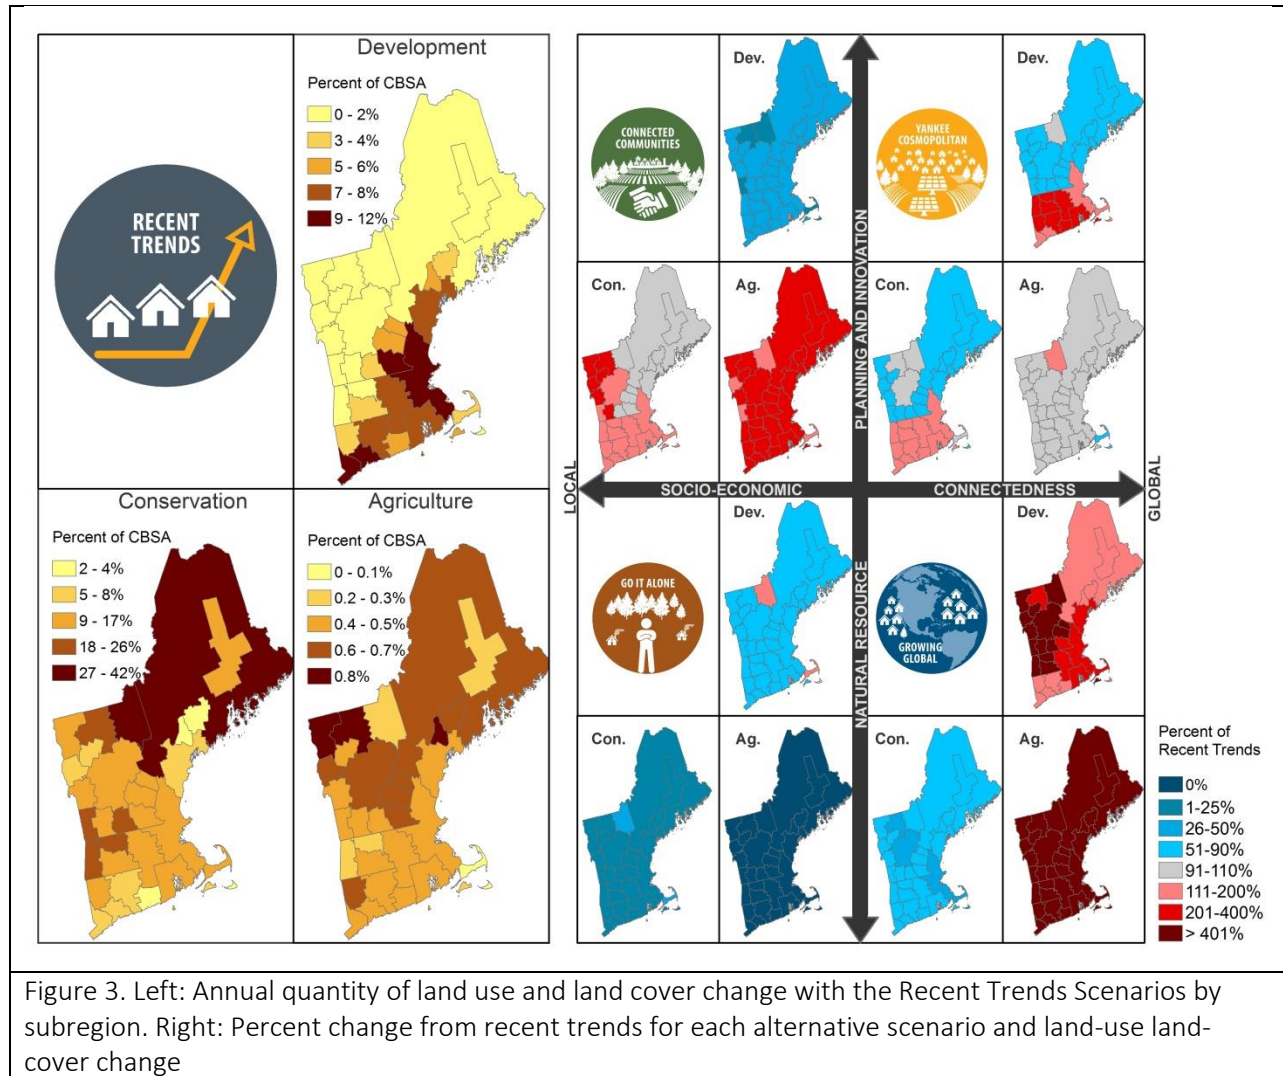

Figure 3. Left: Annual quantity of land use and land cover change with the Recent Trends Scenarios by subregion. Right: Percent change from recent trends for each alternative scenario and land-use land-cover change

182

183 *Simulating co-designed scenarios:*

184 We simulated each of the five LULC change scenarios using Dinamica (Figure 4). The first scenario, the  
 185 *Recent Trends*, projects the types, rates, and spatial allocation of land cover change and land protection  
 186 observed during the period spanning 1990 to 2010. Thompson et al. (2017) described the approach for  
 187 simulating the *Recent Trends* scenario; all LULC transitions in the alternative scenarios were simulated  
 188 using the same approach. For every LULC transition type, the rate, and allocation observed within each  
 189 subregion was applied to each time step in the simulation. For the *Recent Trends* scenario, the  
 190 transition rate and spatial allocation of the transitions was based on the conversion rate, average patch  
 191 sizes, ratios of new patch to patch expansion, and patch shape complexity found within the transitions  
 192 observed in the 1990 to 2010 reference period. The spatial distribution of LULC change was based on  
 193 observed relationship to eight predictor variables (Table 2). When a subregion could not accommodate a  
 194 new LULC transition, any remaining unfulfilled transitions were evenly distributed to neighboring  
 195 subregions. This allowed high development growth subregions like Boston (#7) to spill over into

196 neighboring subregions. The exception to this rule was the island subregions of Nantucket (#28) and  
197 Martha's Vineyard (#3), which were not allowed to spill over since they had no neighboring subregions.

Table 2. Driver variables.

| Variable                                    | Units                       | Minimum Bin Size | Source                                                                                                                                        |
|---------------------------------------------|-----------------------------|------------------|-----------------------------------------------------------------------------------------------------------------------------------------------|
| Distance to Development                     | Meters                      | 100 m            | Olofsson et al. 2016                                                                                                                          |
| Distance to Cities with population > 30,000 | Meters                      | 10,000 m         | U.S. Department of the Census 1990, 2010                                                                                                      |
| Distance to Roads/Highways                  | Meters                      | 100 m            | Olofsson et al. 2016                                                                                                                          |
| Slope                                       | Degrees                     | 2°               | U.S. Department of the Census 1990, 2010                                                                                                      |
| Land Owner Type                             | Categorical                 | NA               | Sewall GIS Services 2015<br><a href="http://www.sewall.com/services/geospatial/gis.php">http://www.sewall.com/services/geospatial/gis.php</a> |
| Wetlands                                    | Categorical                 | NA               | U.S. Fish and Wildlife Service 2016, Federal Emergency Management Agency 2016, United States Geological Service 2016.                         |
| Population Density                          | People per Square Kilometer | 25 ppl/sq. km.   | U.S. Department of the Census 1990, 2010.                                                                                                     |
| Farm Soil                                   | Categorical                 | NA               | U.S. Department of Agriculture 2016.                                                                                                          |

198

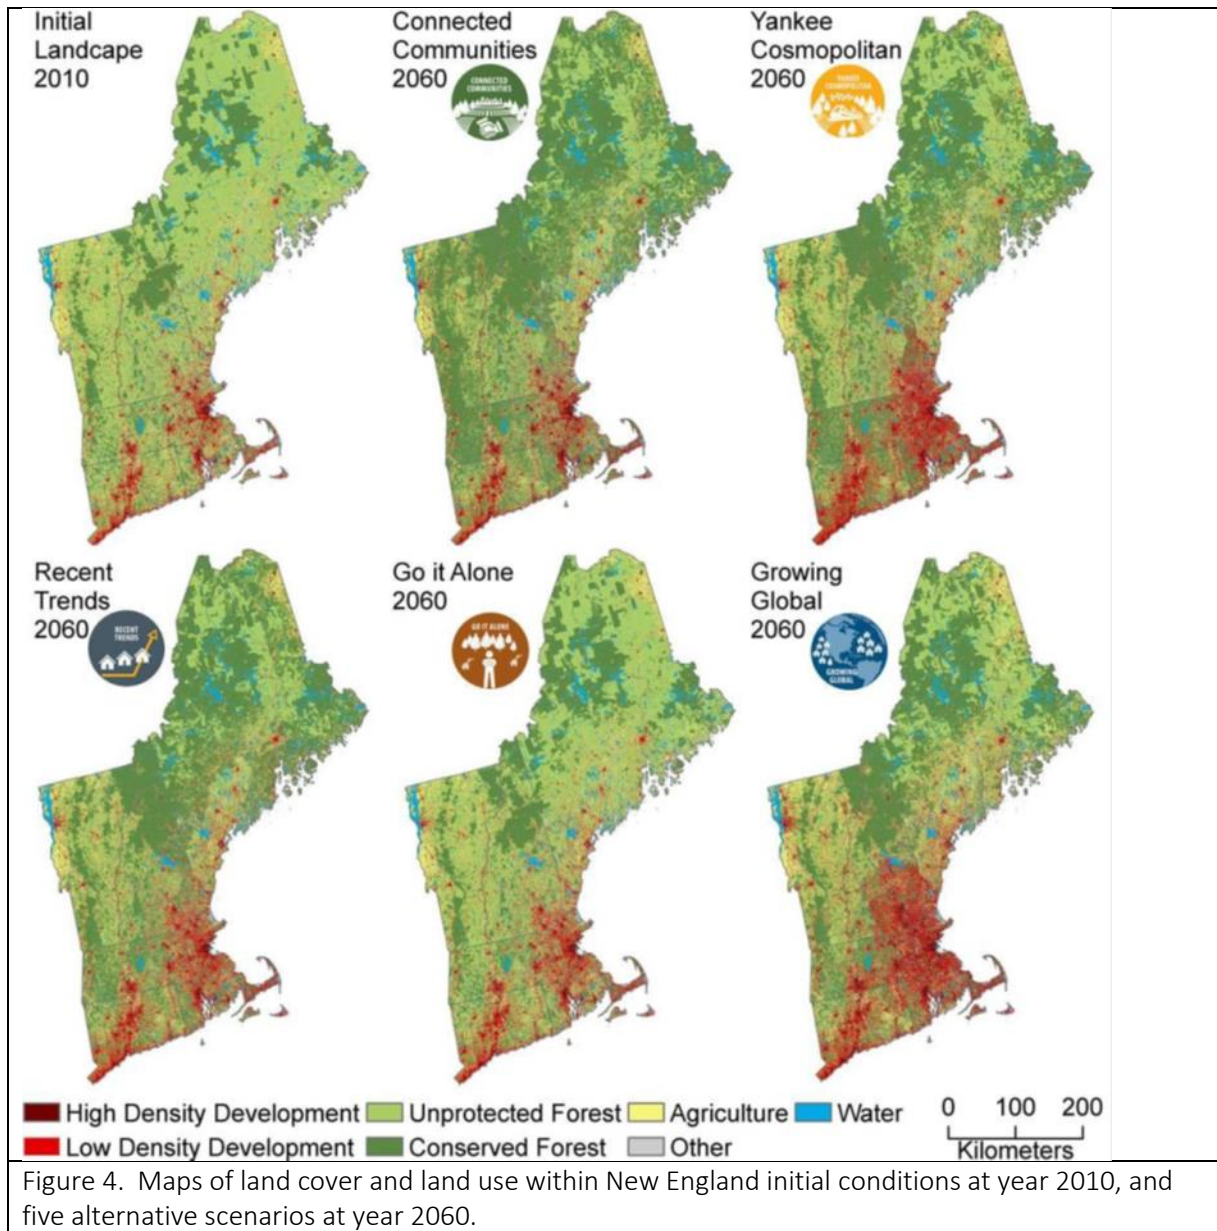

199

200 The four co-designed scenarios have many distinct characteristics of LULC change; they are: *Yankee*  
201 *Cosmopolitan*, *Connected Communities*, *Go it Alone*, and *Growing Global* (Box 1). The spatial distribution  
202 of each land use in each scenario varied across the landscape and among the scenarios (Figure 4). We  
203 used the qualitative descriptions of land-use change provided by the stakeholders in the scenario  
204 narratives to develop and propose spatial allocation plans for the land-use transitions in the co-designed  
205 scenarios. These spatial allocation plans were presented to the stakeholders in terms of modifications to  
206 the baseline weights calculated for the *Recent Trends* scenario. These modifications were then vetted  
207 with the stakeholders via webinars and online real-time polling to assess whether they accurately  
208 captured their intended deviation from the spatial patterns present in *Recent Trends*. For example, the  
209 *Connected Communities* scenario narrative stated that “New settlements tend to occur in planned urban  
210 centers”; in response, we suggested that the probability of development be increased as a function of

211 proximity to urban centers and, in a webinar, the stakeholders voted on one of three such modifications  
 212 that differed in terms of the magnitudes of the adjustment. Table 3 shows the final spatial allocation  
 213 plans in conjunction with their corresponding quotes from the scenario narratives. The stakeholders  
 214 assumed that shifts in the LULC change regime would take some time to deviate from the *Recent Trends*  
 215 rate, so in the first ten-year time step, the rates of LULC change ramp up or down to half of their final  
 216 target rate (Figure 5).

| Narrative Quotes (Stakeholders)                                                                                                                                                                                                                                                                                                                                                                                                                                                                                                                                                                                                                                                                                                                                                                                                                                                                                                                                                                                                                                                                                                                                                                                                                                                               | Spatial Allocation Plan (Modeling Team)                                                                                                                                                                                                                                                                                                                                                                                                                                                                                                                                                                                                                                                                                                                                                                                                                                                                                                                                                                                                                                                                                                                                                                                                                                                                                                                                                                                                                                                                                                                             |
|-----------------------------------------------------------------------------------------------------------------------------------------------------------------------------------------------------------------------------------------------------------------------------------------------------------------------------------------------------------------------------------------------------------------------------------------------------------------------------------------------------------------------------------------------------------------------------------------------------------------------------------------------------------------------------------------------------------------------------------------------------------------------------------------------------------------------------------------------------------------------------------------------------------------------------------------------------------------------------------------------------------------------------------------------------------------------------------------------------------------------------------------------------------------------------------------------------------------------------------------------------------------------------------------------|---------------------------------------------------------------------------------------------------------------------------------------------------------------------------------------------------------------------------------------------------------------------------------------------------------------------------------------------------------------------------------------------------------------------------------------------------------------------------------------------------------------------------------------------------------------------------------------------------------------------------------------------------------------------------------------------------------------------------------------------------------------------------------------------------------------------------------------------------------------------------------------------------------------------------------------------------------------------------------------------------------------------------------------------------------------------------------------------------------------------------------------------------------------------------------------------------------------------------------------------------------------------------------------------------------------------------------------------------------------------------------------------------------------------------------------------------------------------------------------------------------------------------------------------------------------------|
|  <p><b>Connected Communities</b></p> <ol style="list-style-type: none"> <li>1. "From the early 2020s onward, local and regional governments have used tax incentives, public policies, and market subsidies to drive a shift toward sustainability and climate resilience."</li> <li>2. "This renewed focus on community planning and protection of natural resources has advanced 'smart growth' measures that balance development needs with the need to protect natural infrastructure."</li> <li>3. "New settlements tend to occur in planned urban centers..."</li> <li>4. "...resulting in higher density development (in-fill), and as pockets of clustered growth at the urban fringe."</li> <li>5. "Strong urban planning yields developments where more people can walk to work."</li> <li>6. "With the interest in localism there is a strong focus on the protection of wildlands for wildlife and ecosystem services."</li> <li>7. "State and local governments have invested greater public funding in land protection for forest health, flood control, and water quality."</li> <li>8. "Municipal governments are also protecting land for public parks near population centers."</li> </ol> | <ol style="list-style-type: none"> <li>1. Probability of development is reduced by -40%:1k, -30%:2k, -20%:3k, and -10%:4k away from the coast.</li> <li>2. All FEMA +1 foot sea level rise, FWS wetlands, and NHD flood risk zones are ineligible for development.</li> <li>3. Probability of development is increased by 30% within 1k of a city center with population over 10,000, 29% within 2k, 28% within 3k, ramping down to 1% within 30k.</li> <li>4. Mean patch size for new development has been doubled. Isometry modifier increased from 1.1 to 1.2. The ratio of new vs. expansion patches has been increased by + 0.1 for all regions (a few regions max out at 100% by expansion).</li> <li>5. Probability of development is increased close to town centers. +30%:1k, +25%:2k, +20%:3k, +15%:4k, +10%:5k.</li> <li>6. Probability of conservation types Private Reserves, Private Working Forests, and Small Private Multi-Use forests have probability increased by 10% in all high priority conservation areas (State Wildlife Action Plans).</li> <li>7. Probability of conservation type Public Multi Use increase by 20% in all high priority conservation areas (State Wildlife Action Plans) and in the top 25% Forest to Faucets defined high importance watersheds, plus a further increase of 10% in FEMA and NHD flood zones.</li> <li>8. Probability conservation type Public Park is increased by 30% within 1k of city centers with populations over 10,000, 29% within 2k, 28% within 3k, ramping down to 1% within 30k.</li> </ol> |
|  <p><b>Yankee Cosmopolitan</b></p> <ol style="list-style-type: none"> <li>1. "New England has experienced substantial population growth spurred by climate and economic migrants who are seeking areas less vulnerable to heat waves, drought, and sea-level rise."</li> </ol>                                                                                                                                                                                                                                                                                                                                                                                                                                                                                                                                                                                                                                                                                                                                                                                                                                                                                                                             | <ol style="list-style-type: none"> <li>1. Probability of development is reduced by 20% within 500m of the coast, -19% 1000m from the coast, -18% 1500m from the coast, down to -1% 20k from the coast. All NOAA +1 foot coastal flood zones have no chance of development.</li> </ol>                                                                                                                                                                                                                                                                                                                                                                                                                                                                                                                                                                                                                                                                                                                                                                                                                                                                                                                                                                                                                                                                                                                                                                                                                                                                               |

|                                                                                                                                                                                                                                                                                                                                                                                                                                                                                                                                                                                                                                                                                                                                                                                                                                                                                                                                                                                                                                                                                                                                                    |                                                                                                                                                                                                                                                                                                                                                                                                                                                                                                                                                                                                                                                                                                                                                                                                                                                                                                                                                                                                                                                                                                                                                                                                                                                                                                                                                                                            |
|----------------------------------------------------------------------------------------------------------------------------------------------------------------------------------------------------------------------------------------------------------------------------------------------------------------------------------------------------------------------------------------------------------------------------------------------------------------------------------------------------------------------------------------------------------------------------------------------------------------------------------------------------------------------------------------------------------------------------------------------------------------------------------------------------------------------------------------------------------------------------------------------------------------------------------------------------------------------------------------------------------------------------------------------------------------------------------------------------------------------------------------------------|--------------------------------------------------------------------------------------------------------------------------------------------------------------------------------------------------------------------------------------------------------------------------------------------------------------------------------------------------------------------------------------------------------------------------------------------------------------------------------------------------------------------------------------------------------------------------------------------------------------------------------------------------------------------------------------------------------------------------------------------------------------------------------------------------------------------------------------------------------------------------------------------------------------------------------------------------------------------------------------------------------------------------------------------------------------------------------------------------------------------------------------------------------------------------------------------------------------------------------------------------------------------------------------------------------------------------------------------------------------------------------------------|
| <p>2. "Proactive city planning as well as public and private investment in infrastructure have helped to meet the needs of New England's growing population through well-planned housing, transportation hubs, and municipal services near city centers."</p> <p>3. "As the population influx continues through the 2030s and 2040s, the pace of development begins to exceed the planning and physical capacity of many cities and development patterns devolve into sprawl."</p> <p>4. "Smart growth, high-density urban development, and carbon offset markets have facilitated a doubling in rates of land protection within high priority conservation areas throughout the 2020s and 2030s."</p> <p>5. "New urban parks track with new development."</p> <p>6. "Land protection priorities focus on the maintenance of ecosystem services, particularly in southern New England where cities depend on watershed lands for low-cost, clean drinking water."</p> <p>7. "In northern New England a modest increase in agriculture occurs near existing farms and some small patch farming emerges near towns to feed local niche markets."</p> | <p>2. Probability of development is increased by 30% within 1k of city centers with populations over 10,000, 29% within 2k, 28% within 3k, ramping down to 1% within 30k. Reduced probability of development on prime agricultural soils by 10%. All FEMA and NHD flood risk zones have probability of development reduced by 20%.</p> <p>3. Mean patch size for new development has been doubled. Isometry modifier increased from 1.1 to 1.2. The ratio of new vs. expansion patches has been increased by +0.1 for all regions (a few regions max out at 100% by expansion). From 2030 onward, patterns follow recent trends.</p> <p>4. Probability of conservation has been increased by 20% on all high priority conservation areas (State Wildlife Action Plans).</p> <p>5. Probability of new public park creation is increased by 30% within 1k of city centers with populations over 10,000, 29% within 2k, 28% within 3k, ramping down to 1% within 30k.</p> <p>6. Probability of conservation has been increased by 20% in MA, CT, and RI in the top 25% Forest to Faucets defined high importance watersheds.</p> <p>7. All non-prime agricultural soils are ineligible for new agriculture. Zero probability of new agriculture within Census Urban Areas, but increase by 30% within 1k, 29% within 2k, 28% within 3k, down to 1% within 30k of the urban area boundary.</p> |
|  <p><b>Growing Global</b></p> <p>1. "New England is characterized by sprawling cities with poor transportation infrastructure, inefficient energy use, and haphazard expansion of residential development. Walkability in most cities is low and cars remain necessary to access services in most parts of the region."</p> <p>2. "New residential and commercial development around parks serve the wealthy and perforate forests around protected lands."</p> <p>3. "U.S. food exports surge in response to changing global agricultural commodity markets, and drive the conversion of forestland to farmland. These new agricultural lands mostly extend out from existing farmland, and typically take the form of large-scale, intensive production farms for commodity crops by leading multinational agri-businesses."</p>                                                                                                                                                                                                                              | <p>1. Increase probability around highways by 20%-100m 15%-200m 10%-300m 5%-400 so that cities sprawl along transportation corridors.</p> <p>2. Probability of new development has been increased by 10% within 90m of all conservation area boundaries.</p> <p>3. All prime agricultural soil and non-prime soils within 300m of prime soil are eligible for conversion to agriculture. Mean new agricultural patch size has been increased by 1000%. The ratio of new vs. expansion has been increased by +0.25 for all regions (some regions max out at 100% by expansion).</p>                                                                                                                                                                                                                                                                                                                                                                                                                                                                                                                                                                                                                                                                                                                                                                                                         |
|  <p><b>Go It Alone</b></p> <p>1. Spatial allocation identical to Recent Trends</p>                                                                                                                                                                                                                                                                                                                                                                                                                                                                                                                                                                                                                                                                                                                                                                                                                                                                                                                                                                              | <p>1. Spatial allocation identical to Recent Trends. Only differences are in land-use quantity</p>                                                                                                                                                                                                                                                                                                                                                                                                                                                                                                                                                                                                                                                                                                                                                                                                                                                                                                                                                                                                                                                                                                                                                                                                                                                                                         |

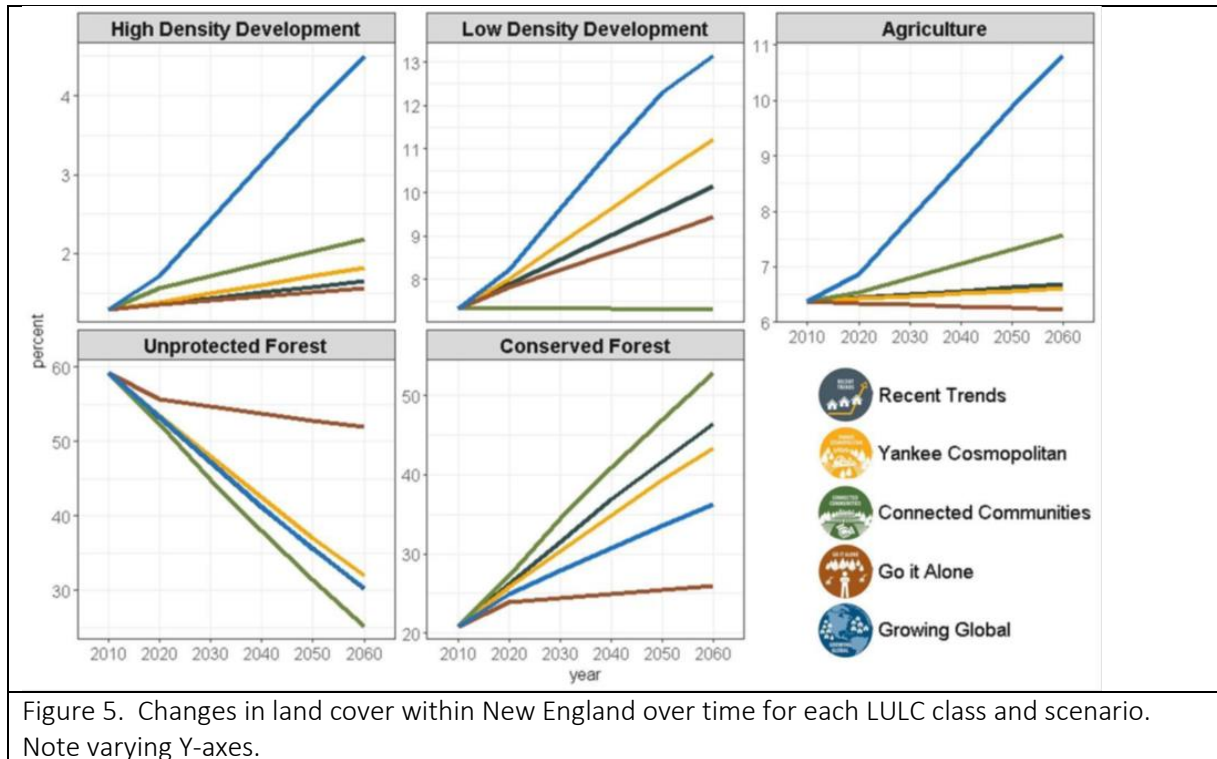

217

218 *Scenario Impacts on Conservation Priorities:*

219 To explore the impacts of the scenarios, we estimated the impacts of simulated LULC change on forests  
 220 within each scenario on the following seven key Impact Areas. We selected these areas because they  
 221 serve as reasonable proxies for a range of values and conditions that are important to stakeholders  
 222 (McBride et al. 2019) and have been mapped previously within New England.

- 223 (i) *Core Forests*, were delineated as forested areas that are >30 meters from a non-forest  
 224 land cover at the start of the simulation (i.e., in 2010).
- 225 (ii) *Flood Zones*, were defined where Federal Emergency Management Agency FEMA Flood  
 226 Zones with 1% annual probability of flooding (Zones A, AE, AH, AO, and VE) (Federal  
 227 Emergency Management Agency 2017). Note that not all subregions have FEMA-defined  
 228 Flood zones.
- 229 (iii) *Surface Drinking Water*, were defined as the 25% highest scoring watersheds classified by  
 230 the US Forest Service Forest to Faucets report (Weidner and Todd 2011). Watersheds  
 231 were ranked based on the importance of their surface water quality in relation to the  
 232 human demand on that water supply.
- 233 (iv) *Wildlife Habitats*, were delineated using State Wildlife Action Plans (SWAP) (New  
 234 Hampshire Fish and Game Department 2012, Maine Dept. of Inland Fisheries and Wildlife  
 235 2015, Massachusetts Division of Fisheries and Wildlife 2015, Rhode Island Department of  
 236 Environmental Management Division of Fish and Wildlife 2015, State of Connecticut  
 237 Department of Energy and Environmental Protection 2015, Vermont Fish & Wildlife  
 238 Department 2015). We accounted for state level variation in wildlife conservation

239 priorities and for the variable proportion of land given priority status by focusing on the  
240 top tiers of each state's Wildlife Habitat priorities as high-value wildlife conservation  
241 assets and then standardized the scores by scaling them relative to the mean score for all  
242 land in each state. Therefore, wildlife habitat values greater than 1.0 indicate areas with  
243 better than average wildlife value.

244 (v) *TNC Priority Conservation Areas*, was delineated based on The Nature Conservancy's  
245 Priority Conservation Areas. These areas aim to represent the full distribution and  
246 diversity of native species, natural communities, and ecosystems such that a conserving  
247 these areas will ensure the long-term survival of all native life and natural communities,  
248 not just threatened species and communities.

249 (vi) *Wetlands*, were defined as wetlands classified by the National Wetlands Inventory  
250 Wetlands (U S Fish and Wildlife Service 2012).

251 (vii) *Prime Farmlands*, were identified using the Farmland Class from the Gridded Soil Survey  
252 Geographic (gSSURGO) Database (SSURGO Soil Survey Staff 2011). We merged the  
253 Farmland Classes: farmland of statewide importance, all areas are prime farmland,  
254 farmland of unique importance, and farmland of local importance into one "Prime  
255 Farmlands" classification.

256 Impact Areas were assessed based on the amount of land available for conversion to either  
257 development or conservation at the start of the simulations in 2010. Areas already developed or  
258 conserved in 2010 were considered unavailable and were thus not assessed. Additionally, areas within  
259 delineated Impact Areas that were ineligible for a transition based on our model rules (e.g. non-forest  
260 covers such as agriculture, water and other) were not considered.

261

#### 262 *Developing outreach tool:*

263 We used the scenarios and simulation products to develop an online interactive mapping tool to portray  
264 the interaction between land use choices and land use outcomes in New England and support efforts by  
265 community groups and conservation groups to explore how they might adapt their LULC plans and  
266 conservation priorities to ensure that they are robust under an uncertain future. The tool, the NELF  
267 Explorer ([www.newenglandlandscapes.org](http://www.newenglandlandscapes.org)) was built by FernLeaf Interactive and the National  
268 Environmental Modeling and Analysis Center (NEMAC) at the University of North Carolina Asheville. The  
269 NELF Explorer was built using the simulation outputs in consultation with user perspectives, via a project  
270 launch visioning session plus three cycles of prototyping and user-review. Users can use the NELF Explorer  
271 to navigate among five scenarios (Recent Trends, Go it Alone, Connected Communities, Yankee  
272 Cosmopolitan, and Growing Global) and visualize how each scenario influences land use and ecosystem  
273 services at 5 time-points (2010, 2020, 2030, 2040, 2050, 2060), across all six New England states, at  
274 multiple scales including state, county, town, and watershed. The NELF Explorer displays maps with land  
275 use color coded (High Density Development, Low Density Development, Unprotected Forest, Conserved  
276 Forest, Agriculture, and Water). Graphs show the number of acres in each type of land use for each  
277 scenario at the six time-points. Also, the outcomes of scenario comparisons in 2060 for Impact Areas of  
278 Flood Zones, Surface Drinking Water, Wildlife Habitats, Priority Conservation Areas, Wetlands, Prime  
279 Farmland, and Core Forests are described within the tool. The tool is static; the underlying data and

280 calculations were completed in advance via the simulation process. Therefore, the NELF Explorer is a  
281 conduit for accessing pre-computed data and visualizations.

282

## 283 RESULTS:

### 284 *Recent Trends*

285 The *Recent Trends* scenario assumes a continuation of the LULC changes observed between 1990 and  
286 2010. The rate of LULC change is constant throughout the scenario: New development covers 97 km<sup>2</sup> per  
287 year; new agriculture covers 16 km<sup>2</sup> per year; and new land protection covers in 835 km<sup>2</sup> per year. At year  
288 2060 (after simulating 50 years of LULC change), developed land increased by 37% (from 14,098 to  
289 19,265 km<sup>2</sup>); there was little change (< 5%) in agricultural land cover (10,409 to 10,908 km<sup>2</sup>). The largest  
290 LULC change was to protected land, which increased by 123% (from 35,300 to 78,500 km<sup>2</sup>).

291 Throughout the fifty-year simulation, the rate of land protection in the *Recent Trends* scenario was more  
292 than eight times greater than the rate of development. Because Impact Areas are not evenly distributed  
293 throughout New England, the spatial distribution of land protection in the *Recent Trends* scenario was  
294 most effective for securing protection in Impact Areas that are concentrated in the north, such as Core  
295 Forest, where 48% was protected and only 3% developed and *TNC Priority Conservation Areas* where 49%  
296 was protected and only 4% developed. Impact Areas that are concentrated in the south, such as with the  
297 Important Watersheds for Drinking water only 28% was Protected and 11% was developed. In addition,  
298 the impact of LULC change on other conservation priorities was driven by local patterns observed in the  
299 historical data. For example, wetlands have regulatory protection (included in our model) and thus have a  
300 low probability of development. Indeed, despite being common throughout the region, 45% of forested  
301 wetland areas were protected while just 0.7% were developed (note that non-forested wetlands were  
302 protected from any transition).

### 303 *Yankee Cosmopolitan*

304 The *Yankee Cosmopolitan* scenario envisions a future New England that is a global hub of activity, with  
305 commensurate changes to land use. The population is growing much faster than *Recent Trends*, but, at  
306 the same time, natural resource planning and innovation are a priority. To accommodate population  
307 growth spurred by climate and economic migrants, development occurred at a rate 40% greater than  
308 *Recent Trends* (136 km<sup>2</sup> per year). Global food supply chains required minimal agriculture expansion,  
309 which was maintained at 16 km<sup>2</sup> per year (the same as *Recent Trends*). The rate of new land protection  
310 was reduced in the north and increased in the south, relative to *Recent Trends*. Overall, across the region,  
311 the rate of land protection in this scenario was 736km<sup>2</sup> per year, 12% lower than *Recent Trends*.

312 *Yankee Cosmopolitan* includes several modifications to the spatial allocation of LULC change in *Recent*  
313 *Trends*, which were intended to minimize development within areas desirable for protection. However,  
314 the large (40%) increase in the rate of development often overwhelmed modifications to the spatial  
315 allocation rules. For example, the spatial allocation plan for *Yankee Cosmopolitan* included a reduced  
316 probability of new development within flood zones (Table 3); nonetheless, forest loss within flood zones  
317 by year 2060 was 86% higher than in *Recent Trends*. Reduced development probability in flood zones was  
318 only effective in rural subregions, where there was less development pressure. In urbanizing subregions,  
319 where development rates were highest even low probability sites were eventually developed. Similarly,



320 the spatial allocation plan for this scenario increased the probability of land protection within wildlife  
321 habitat areas; however, the increased rate of development had a greater influence. Overall, while there  
322 was a small increase in protected land within wildlife habitat areas, there was also a 49% increase in  
323 developed areas, as compared to *Recent Trends*. Other modifications to the spatial allocation were more  
324 effective. For example, this scenario envisioned more urban parks thus the spatial allocation plan  
325 increased the probability of new protected lands within two km of city centers, which resulted in a 75%  
326 increase in protected areas within two km of city centers, compared to the *Recent Trends* scenario. In  
327 addition, concentrating development around city centers resulted in a similar amount of core forest to  
328 the *Recent Trends*, despite accommodating 40% more development.

### 329 *Connected Communities*

330 The *Connected Communities* scenario envisions a future characterized by local socio-economic  
331 connectedness and high natural resource planning and innovation. Population growth slowed and  
332 became more compact and, as a result, the rate of new development was just 25% of the rate in the  
333 *Recent Trends*—24 km<sup>2</sup> per year. Local agriculture expanded to meet the need for local food and forests  
334 were converted to new agricultural land at a rate of 41 km<sup>2</sup> per year, more than 248% of the rate of  
335 forests to agriculture simulated in *Recent Trends*. This scenario also included a strong focus on land  
336 protection for wildlife and ecosystem services; the rate of new land protection was 1045 km<sup>2</sup> year.

337 Consistent with this scenario's emphasis on natural resource conservation and planning, the spatial  
338 allocation of LULC change in the *Connected Communities* scenario included a lower probability of  
339 development and increased probability of land protection within flood zones, wildlife habitat areas and  
340 important drinking water watersheds. These modifications, combined with a lower overall rate of new  
341 development, resulted in: a 77% decrease in the amount of development in flood zones by 2060; an 80%  
342 decrease in the amount of development in wildlife habitat areas; and 71% increase in land protection in  
343 drinking water important watersheds. Indeed, the *Connected Communities* scenario had the greatest  
344 increase in the amount of protected land within the Impact Areas across all the scenarios. The scenario  
345 narrative emphasized compact development and the simulation of the scenario had the greatest  
346 proportion of new development was within 10 km of cities among all scenario (XX% more development  
347 within 10km of cities than *Recent Trends*). As part of this scenario's emphasis on climate change  
348 adaptation, the proportion of development within 5-km of the coast (where sea-level rise is a concern)  
349 was significantly less than *Recent Trends*.

350

### 351 *Go It Alone*

352 The *Go It Alone* scenario envisions a future with low natural resource planning and innovation and local  
353 socio-economic connectedness. New England has shrinking economic opportunities and communities  
354 turn heavily to extractive industries. Rates of land development slowed to 75km<sup>2</sup> per year, which was a  
355 25% reduction from *Recent Trends*. Where development continued, it was characterized by unplanned  
356 residential housing that perforates the landscape. There was no new agriculture cover. Land protection  
357 tapered off dramatically early in the scenario and by 2060 there was 80% less new protected land than in  
358 the *Recent Trends* scenario.

359 While the rates are much lower, the spatial allocation of LULC change in *Go It Alone* followed the patterns  
360 developed for the *Recent Trends* Scenario. Less new development resulted in proportionately less forest

361 loss within Impact Areas, including 25% less priority wildlife habitat loss and 31% less development on  
362 flood plains. Relatedly, the large reduction in the rate of land protection resulted in *Go It Alone* having the  
363 lowest level of conservation within Impact Areas among the five scenarios.

#### 364 *Growing Global*

365 The *Growing Global* scenario envisions and landscape undergoing massive changes. Migration into New  
366 England drives up the population. Local planning efforts have failed to keep pace with development.  
367 Economic and social connectivity is globalized while natural resource planning and innovation is low.  
368 Compared to the *Recent Trends* scenario, *Growing Global* resulted in an 182% increase in the rate of new  
369 development, a 900% increase in the rate of new agriculture, and a reduction of 40% in the rate of new  
370 land protection.

371 In this scenario, the total amount of developed land in New England more than doubled (from 14,090 to  
372 28,880 km<sup>2</sup>) by 2060. Boston grew to a sprawling mega city the size of modern day Tokyo, Japan. Rapid  
373 and largely unregulated development resulted in the greatest increase in development within Impact  
374 Areas among all scenarios. For example, the *Growing Global* scenario did not include any spatial modifier  
375 to decrease the probability of development in flood zones or other Impact Areas. As a result, by 2060, this  
376 scenario developed 275% more flood zones compared to the *Recent Trends* scenario. There were  
377 similarly high (+275%) increases in development within high priority wildlife habitats. More than twice as  
378 much land near the coast (<10km) was developed, as compared to the *Recent Trends*.

379

#### 380 **DISCUSSION and CONCLUSIONS:**

381 Our process for translating co-designed qualitative scenarios into quantitative simulations of LULC change  
382 yielded divergent representations of the future New England landscape. The simulations differ markedly  
383 in terms of the amount of LULC change and the spatial pattern of change. Indeed, among scenarios there  
384 is a fivefold difference in the amount of high-density development, and a twofold difference in the  
385 amount of protected land. While all the scenarios represent distinct storylines resulting in discrete  
386 manifestations of those stories, the *Growing Global* scenario stands out for having, by far, the greatest  
387 amount of change. By year 2060, *Growing Global* envisions that urban expansion around Boston will  
388 sprawl to an area covering more than 10,000 km<sup>2</sup>, larger in size than Tokyo, Japan. On one hand, this is  
389 such a drastic change that it may seem implausible to stakeholders and thereby undermine the utility of  
390 the scenario. On the other hand, the simulation is faithful to the stakeholders' storyline, which envisions  
391 New England as a destination for millions of migrants fleeing the growing impacts of climate change  
392 elsewhere (National Climate Assessment 2018). Specifically, the stakeholders describe: "sprawling cities  
393 with poor transportation infrastructure, inefficient energy use, and haphazard expansion of residential  
394 development." The plausibility of this scenario is supported anecdotally by events such as Hurricane  
395 Maria, which, in 2017, displaced as many as 500,000 people from the island of Puerto Rico to the  
396 mainland U.S. (Pew Research Center 2018). Given that a single storm can cause such large changes to  
397 settlement patterns, it will be important to consider the consequences of scenarios, such as *Growing*  
398 *Global* which push our assumptions about how the past can or cannot shape the future. Overall, the  
399 simulated scenarios bound a wide range of future possibilities for the New England landscape and, as  
400 such, have high potential for broadening the perspectives of planners, counteracting a general tendency  
401 toward 'narrow-thinking' when planning for an uncertain future (Soll et al. 2014).

402 Our simulations effectively captured the land-use dynamics and features described in the scenario  
403 storylines. Each specific modification to *Recent Trends* is annotated within the qualitative scenario  
404 descriptions so that our stakeholders can see how their vision for each scenario was incorporated into the  
405 simulation. By identifying specific quotes that referenced differences in land-use patterns, then  
406 translating them into explicit rules for the spatial allocation of simulated LULC change (Table 3), we were  
407 able to capture the intentions of the stakeholders in ways that had substantive and readily attributable  
408 impacts on the simulated landscape. For example, simulated development surrounding the area of Keene,  
409 New Hampshire (subregion 24) in *Go it Alone* and *Yankee Cosmopolitan* both have the same rate of  
410 development but different spatial allocation of that development (Figure 6). The *Yankee Cosmopolitan*  
411 narrative described: “Proactive city planning as well as public and private investment in infrastructure  
412 have helped to meet the needs of New England’s growing population through well-planned housing,  
413 transportation hubs, and municipal services near city centers.” Thus, a spatial modifier was implemented  
414 in this scenario to concentrate development close to city centers while protecting farm soils and limiting  
415 development in flood zones (Table 3). Overall this approach represents an effective and transparent  
416 method for bridging the gap between non-technical stakeholders who developed the scenarios and the  
417 technical experts who simulated them (Mallampalli et al. 2017). We are hopeful that this clear translation  
418 of the scenarios to the simulations bolsters the legitimacy and salience of the participatory scenario  
419 process (*sensu* Cash et al 2002) and results in greater use by the stakeholders and decision-makers.

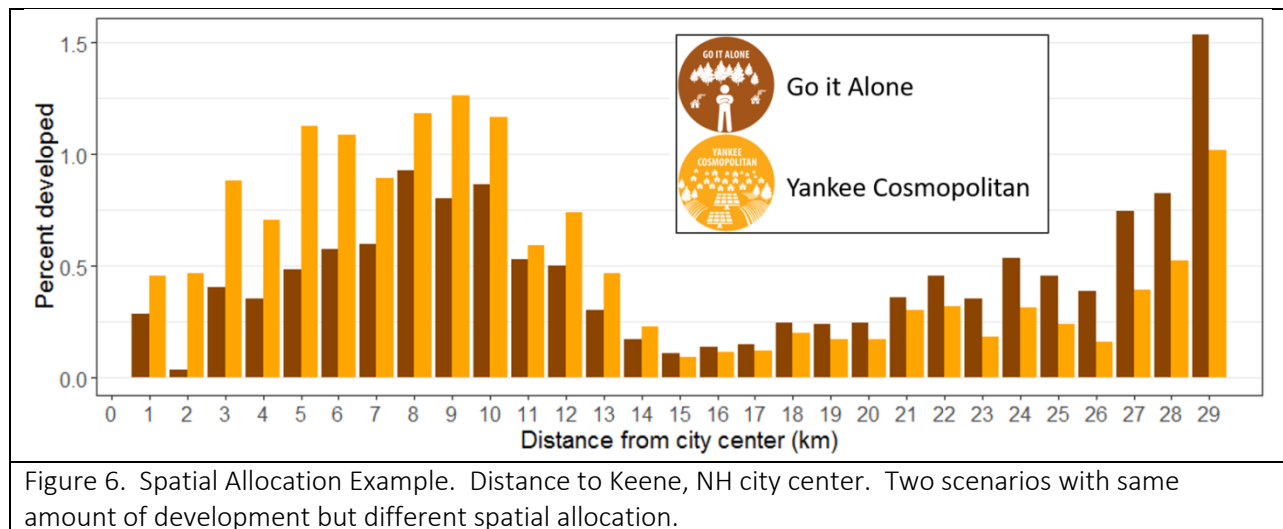

420

421 These simulations reveal much about the potential impacts of future land use on conservation priorities.  
422 In general, the amount of projected LULC change affected the Impact Areas more than the differences in  
423 their spatial allocation. For example, the *Yankee Cosmopolitan* scenario has several spatial allocation rules  
424 designed to mitigate the impacts to conservation goals, including: reduced probability of new  
425 development within flood zones and increased probability of land protection within wildlife habitat areas.  
426 In comparison, the *Go It Alone* scenario has no modifications to the spatial allocation rules. However,  
427 *Yankee Cosmopolitan* has **\*\*87%\*\*** more development than *Go it Alone*. So despite substantial efforts to  
428 mitigate the impacts of development, the *Yankee Cosmopolitan* scenario resulted in more development in  
429 every category of Impact Area than *Go it Alone*. This pattern is consistent across all scenarios and Impact  
430 Areas, inasmuch as the rank order of development within each impact area matched the rank order of  
431 the amount of development, despite strong differences in the spatial allocation patterns (Figure 7).

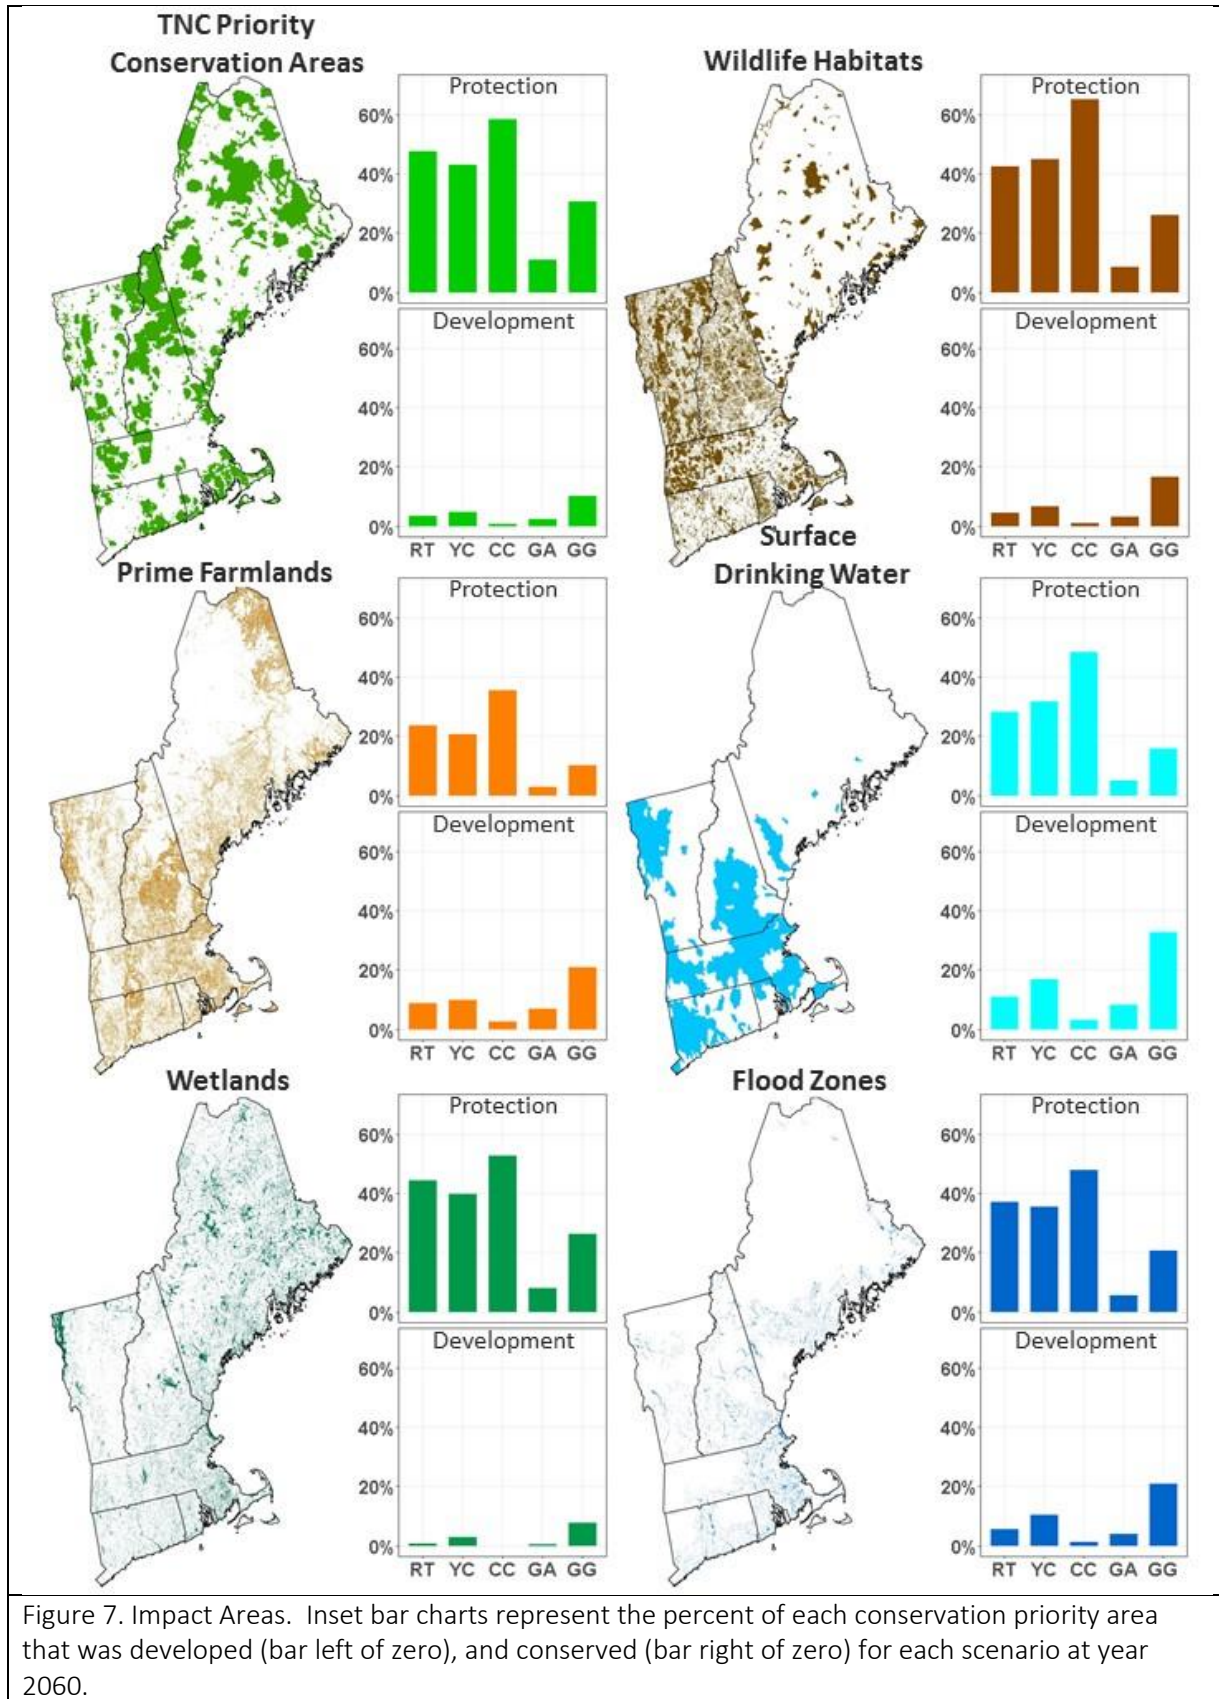

432

433 The simulated land-cover scenarios were designed to meet multiple goals. One key goal was to create  
434 simulated land-cover scenarios that catalyze new research which to understand and advance sustainable  
435 land-use trajectories. In addition to the analyses presented here, our hope is that the scenarios will serve  
436 as a common platform that brings researchers together to examine the consequences of changing land  
437 use. To that end, all the spatial layers (i.e., GIS maps) from this project are available on Data Basin<sup>1</sup>, an  
438 open-source spatial data repository. Indeed, researchers from around the region have begun to use the  
439 simulation outputs within other landscape models to explore how these scenarios affect various  
440 ecosystem services and landscape outcomes.

441 Our final goal was to make the scenarios and simulations available to New England land use  
442 stakeholders to promote future scenario thinking at the community scale and provide a spatial analysis  
443 tool for evaluating risks to specific lands and conservation goals from the local to regional scale. For this  
444 community of users, we developed the New England Landscape Futures (NELF) Explorer<sup>2</sup>. The tool was  
445 designed via a user-engagement process to meet the needs of diverse stakeholders, including  
446 conservationists, planners, developers, government leaders, and citizens who want to explore possible  
447 land-use futures in specific areas. The NELF Explorer was launched in March 2019. We are currently  
448 tracking use of the tool and collaborating with NELF Explorer users to document use cases. Potential uses  
449 of the NELF Explorer include understanding the future of the land through local scenario planning,  
450 conservation and development planning, and community engagement/education.

451

#### 452 **ACKNOWLEDGEMENTS:**

453 This research was supported in part by National Science Foundation funded to the Harvard Forest Long  
454 Term Ecological Research Program (Grant No. NSF-DEB 12-37491) and the Scenarios Society and  
455 Solutions Research Coordination Network (Grant No. NSF-DEB-13-38809). We thank the commitment and  
456 energy offered by the participants of the scenario development process, and Jeff Hicks, Jim Fox, Karin  
457 Rogers, and their team at FernLeaf Interactive and the National Environmental Modeling and Analysis  
458 Center (NEMAC) at the University of North Carolina Asheville, for developing the NELF Explorer.

#### 459 **LITERATURE CITED:**

460 Alcamo, J. 2008. The SAS Approach : Combining Qualitative and Quantitative Knowledge in Environmental  
461 Scenarios. *Environmental futures: The practice of environmental scenario analysis*:123–150.

462 Bradfield, R., G. Wright, G. Burt, G. Cairns, and K. Van Der Heijden. 2005. The origins and evolution of  
463 scenario techniques in long range business planning. *Futures* 37:795–812.

464 Brown, D. G., P. H. Verburg, R. G. Pontius, and M. D. Lange. 2013. Opportunities to improve impact,  
465 integration, and evaluation of land change models. *Current Opinion in Environmental Sustainability*  
466 5:452–457.

467 Carpenter, S. R., E. G. Booth, S. Gillon, C. J. Kucharik, S. Loheide, and A. S. Mase. 2015. Plausible futures of  
468 a social-ecological system : Yahara watershed , Wisconsin , USA 20.

469 Cash, D. W., W. C. Clark, F. Alcock, N. M. Dickson, N. Eckley, D. H. Guston, J. Jäger, and R. B. Mitchell.  
470 2003. Knowledge systems for sustainable development. *Proceedings of the National Academy of*

---

<sup>1</sup> <https://databasin.org/groups/26ceb6c7ece64b0d9872e118bae80d41>

<sup>2</sup> [www.newenglandlandscapes.org](http://www.newenglandlandscapes.org)

- 471 Sciences of the United States of America 100:8086–91.
- 472 Dorning, M. A., J. Koch, D. A. Shoemaker, and R. K. Meentemeyer. 2015. Simulating urbanization scenarios  
473 reveals tradeoffs between conservation planning strategies. *Landscape and Urban Planning* 136:28–  
474 39.
- 475 Federal Emergency Management Agency. 2017. Federal Emergency Management Agency Flood Zones.
- 476 Foster, D. R., K. Fallon Lambert, D. B. Kittredge, B. Donahue, C. M. Hart, W. Labich, S. R. Meyer, J. R.  
477 Thompson, M. Buchanan, J. Levitt, R. Perschel, K. Ross, G. Elkins, C. Daigle, B. Hall, E. Faison, A. W.  
478 D’Amato, R. T. T. Forman, P. Del Tredici, L. Irland, B. Colburn, D. Orwig, J. Aber, A. Berger, C. Driscoll,  
479 W. Keetong, R. J. Lillieholm, N. Pederson, A. Ellison, M. Hunter, and T. Fahey. 2017. *Wildlands and  
480 Woodlands, Farmlands and Communities: Broadening the Vision for New England*. Harvard Forest,  
481 Harvard University, Petersham, MA.
- 482 Homer, C., J. Fry, and C. Barnes. 2012. The national land cover database. US Geological Survey Fact Sheet.
- 483 Kline, J. D., E. M. White, A. P. Fischer, M. M. Steen-Adams, S. Charnley, C. S. Olsen, T. A. Spies, and J. D.  
484 Bailey. 2017. Integrating social science into empirical models of coupled human and natural  
485 systems. *Ecology and Society* 22:25.
- 486 MA. 2005. *Millennium Ecosystem Assessment; Ecosystems and Human Well-Being: Scenarios*. Island  
487 Press, Washington DC.
- 488 Mahmoud, M., Y. Liu, H. Hartmann, S. Stewart, T. Wagener, D. Semmens, R. Stewart, H. Gupta, D.  
489 Dominguez, F. Dominguez, D. Hulse, R. Letcher, B. Rashleigh, C. Smith, R. Street, J. Ticehurst, M.  
490 Twery, H. van Delden, R. Waldick, D. White, and L. Winter. 2009. A formal framework for scenario  
491 development in support of environmental decision-making. *Environmental Modelling & Software*  
492 24:798–808.
- 493 Maine Dept. of Inland Fisheries and Wildlife. 2015. *Maine’s Wildlife Action Plan*. Maine Department of  
494 Inland Fisheries Wildlife.
- 495 Mallampalli, V. R., G. Mavrommati, J. R. Thompson, M. J. Duveneck, S. R. Meyer, A. Ligmann-Zielinska, C.  
496 Druschke, K. Hychka, M. Kenny, K. Kok, and M. E. Borsuk. 2016. Methods for translating narrative  
497 scenarios into quantitative assessments of land-use change. *Environmental Software and Modeling*  
498 82:7–20.
- 499 Massachusetts Division of Fisheries and Wildlife. 2015. *Massachusetts State Wildlife Action Plan*.
- 500 McBride, M. F., M. J. Duveneck, K. F. Lambert, K. A. Theoharides, and J. R. Thompson. 2019. Perspectives  
501 of resource management professionals on the future of New England’s landscape: Challenges,  
502 barriers, and opportunities. *Landscape and Urban Planning*:0–1.
- 503 McBride, M. F., K. Fallon Lambert, E. S. Huff, K. A. Theoharides, P. Field, and J. R. Thompson. 2017.  
504 Increasing the effectiveness of participatory scenario development through codesign. *Ecology and  
505 Society* 22.
- 506 New Hampshire Fish and Game Department. 2012. *New Hampshire Wildlife Action Plan*.
- 507 Olofsson, P., C. E. Holden, E. L. Bullock, and C. E. Woodcock. 2016. Time series analysis of satellite data  
508 reveals continuous deforestation of New England since the 1980s. *Environmental Research Letters*  
509 11:1–8.

- 510 Pedde, S., K. Kok, I. Holman, and P. A. Harrison. 2018. Bridging uncertainty concepts across narratives and  
511 simulations in environmental scenarios.
- 512 Ramírez, R., and C. Selin. 2014. Plausibility and probability in scenario planning. *Foresight* 16:54–74.
- 513 Reed, M. S., J. Kenter, A. Bonn, K. Broad, T. P. Burt, I. R. Fazey, E. D. G. Fraser, K. Hubacek, D. Nainggolan,  
514 C. H. Quinn, L. C. Stringer, and F. Ravera. 2013. Participatory scenario development for  
515 environmental management: A methodological framework illustrated with experience from the UK  
516 uplands. *Journal of Environmental Management* 128:345–362.
- 517 Rhode Island Department of Environmental Management Division of Fish and Wildlife. 2015. Rhode Island  
518 Wildlife Action Plan:1–4.
- 519 Rounsevell, M. D. A., I. Reginster, M. B. Araújo, T. R. Carter, N. Dendoncker, F. Ewert, J. I. House, S.  
520 Kankaanpää, R. Leemans, M. J. Metzger, C. Schmit, P. Smith, and G. Tuck. 2006. A coherent set of  
521 future land use change scenarios for Europe. *Agriculture, Ecosystems and Environment* 114:57–68.
- 522 Sims, K. R. E., J. R. Thompson, S. R. Meyer, C. Nolte, and J. S. Plisinski. 2019. Assessing the local economic  
523 impacts of land protection. *Conservation Biology* 0:cobi.13318.
- 524 Soares-Filho, B. S., G. Coutinho Cerqueira, and C. Lopes Pennachin. 2002. DINAMICA - A stochastic cellular  
525 automata model designed to simulate the landscape dynamics in an Amazonian colonization  
526 frontier. *Ecological Modelling* 154:217–235.
- 527 Soares-Filho, B. S., H. O. Rodrigues, and W. L. Costa. 2009. Modeling Environmental Dynamics with  
528 Dinamica EGO.
- 529 Sohl, T. L., M. C. Wimberly, V. C. Radeloff, D. M. Theobald, and B. M. Sleeter. 2016. Divergent projections  
530 of future land use in the United States arising from different models and scenarios. *Ecological  
531 Modelling* 337:281–297.
- 532 Soll, J. B., K. L. Milkman, and J. W. Payne. 2014. A user's guide to debiasing. Page *in* G. Wu, editor.  
533 *Handbook of Judgment and Decision Making*. Wiley-Blackwell.
- 534 SSURGO Soil Survey Staff. 2011. Natural Resources Conservation Service, United States Department of  
535 Agriculture. Soil Survey Geographic (SSURGO) Database for Michigan. Available online at  
536 <http://soildatamart.nrcs.usda.gov>. Accessed [12/20/2011].
- 537 State of Connecticut Department of Energy and Environmental Protection. 2015. Connecticut Wildlife  
538 Action Plan.
- 539 Thompson, J. R., K. Fallon-Lambert, D. R. Foster, M. Blumstein, E. N. Broadbent, and A. M. Almeyda  
540 Zambrano. 2014. Changes to the Land: Four Scenarios for the Future of the Massachusetts  
541 Landscape. Harvard Forest, Harvard University, Petersham, MA.
- 542 Thompson, J. R., K. F. Lambert, D. R. Foster, E. N. Broadbent, M. Blumstein, A. M. A. Zambrano, and Y. Fan.  
543 2016. Four land-use scenarios and their consequences for forest ecosystems and services they  
544 provide. *Ecosphere* 7:1–22.
- 545 Thompson, J. R., J. Plinski, P. Olofsson, C. E. Holden, and M. J. Duveneck. 2017. Forest loss in New  
546 England: A projection of recent trends. *PLoS ONE* 12:1–17.
- 547 Thompson, J. R., A. Wiek, F. Swanson, S. R. Carpenter, N. Fresco, T. N. Hollingsworth, T. A. Spies, and D. R.  
548 Foster. 2012. Scenario Studies as a Synthetic and Integrative Research Activity for Long-Term

- 549 Ecological Research. *BioScience* 62:367–376.
- 550 U S Fish and Wildlife Service. 2012. National Wetlands Inventory-Wetlands.
- 551 Vermont Fish & Wildlife Department. 2015. Vermont’s Wildlife Action Plan:1–1297.
- 552 Voinov, A., and F. Bousquet. 2010. Modelling with stakeholders☆. *Environmental Modelling & Software*  
553 25:1268–1281.
- 554 Weidner, E., and A. Todd. 2011. From the Forest to the Faucet: Drinking Water and Forests in the US.  
555 United States Forest Service, Ecosystem Services and Markets Program Area, State and Private  
556 Forestry:1–34.
- 557 Wiebe, K., M. Zurek, S. Lord, N. Brzezina, G. Gabrielyan, J. Libertini, A. Loch, R. Thapa-parajuli, J. Vervoort,  
558 and H. Westhoek. 2018. Scenario Development and Foresight Analysis : Exploring Options to Inform  
559 Choices. *Annual Reviews*:1–26.
- 560 Wilson, E. H., J. D. Hurd, D. L. Civco, M. P. Prisloe, and C. Arnold. 2003. Development of a geospatial  
561 model to quantify, describe and map urban growth. *Remote Sensing of Environment* 86:275–285.
- 562



563  
564  
565  
566  
567  
568

Appendix I Table 1

| Reclassification Scheme |                            |                                                                                                                                           |                             |                                                                                                                                                                                                                                                                                                                                                                         |
|-------------------------|----------------------------|-------------------------------------------------------------------------------------------------------------------------------------------|-----------------------------|-------------------------------------------------------------------------------------------------------------------------------------------------------------------------------------------------------------------------------------------------------------------------------------------------------------------------------------------------------------------------|
| THIS STUDY              | CCDC Class                 | CCDC Class Description                                                                                                                    | NLCD 2001/2011 Class        | NLCD 2001/2011 Class Description                                                                                                                                                                                                                                                                                                                                        |
| High Density Developed  | Commercial/Industrial      | Area of urban development; impervious surface area target 80-100%                                                                         | Developed High Intensity    | Highly developed areas where people reside or work in high numbers. Examples include apartment complexes, row houses and commercial /industrial. Impervious surfaces account for 80% to 100% of the total cover.                                                                                                                                                        |
|                         | High Density Residential   | Area of residential urban development with some vegetation; impervious surface area target 50-80%                                         | Developed, Medium Intensity | Areas with a mixture of constructed materials and vegetation. Impervious surfaces account for 50% to 79% of the total cover. These areas most commonly include single-family housing units.                                                                                                                                                                             |
| Low Density Developed   | Low Density Residential    | Area of residential urban development with significant vegetation; impervious surface area target 0-50%                                   | Developed, Low Intensity    | Areas with a mixture of constructed materials and vegetation. Impervious surfaces account for 20% to 49% percent of total cover. These areas most commonly include single-family housing units.                                                                                                                                                                         |
|                         |                            |                                                                                                                                           | Developed, Open Space       | Areas with a mixture of some constructed materials, but mostly vegetation in the form of lawn grasses. Impervious surfaces account for less than 20% of total cover. These areas most commonly include large-lot single-family housing units, parks, golf courses, and vegetation planted in developed settings for recreation, erosion control, or aesthetic purposes. |
| Agriculture             | Agriculture                | Non-woody cultivated plants; includes cereal and broadleaf crops                                                                          | Pasture/Hay                 | Areas of grasses, legumes, or grass-legume mixtures planted for livestock grazing or the production of seed or hay crops, typically on a perennial cycle. Pasture/hay vegetation accounts for greater than 20% of total vegetation.                                                                                                                                     |
|                         |                            |                                                                                                                                           | Cultivated Crops            | Areas used for the production of annual crops, such as corn, soybeans, vegetables, tobacco, and cotton, and also perennial woody crops such as orchards and vineyards. Crop vegetation accounts for greater than 20% of total vegetation. This class also includes all land being actively tilled.                                                                      |
| Forest                  | Mixed Forest               | Forested land with at least 40% tree canopy cover comprising no more than 80% of either evergreen needleleaf or deciduous broadleaf cover | Mixed Forest                | Areas dominated by trees generally greater than 5 meters tall, and greater than 20% of total vegetation cover. Neither deciduous nor evergreen species are greater than 75% of total tree cover.                                                                                                                                                                        |
|                         | Deciduous Broadleaf Forest | Forested land with at least 40% tree canopy cover comprising more than 80% deciduous broadleaf cover                                      | Deciduous Forest            | Areas dominated by trees generally greater than 5 meters tall, and greater than 20% of total vegetation cover. More than 75% of the tree species shed foliage simultaneously in response to seasonal change.                                                                                                                                                            |

|       |                             |                                                                                                                                                    |                              |                                                                                                                                                                                                                                                  |
|-------|-----------------------------|----------------------------------------------------------------------------------------------------------------------------------------------------|------------------------------|--------------------------------------------------------------------------------------------------------------------------------------------------------------------------------------------------------------------------------------------------|
|       | Evergreen Needleleaf Forest | Forested land with at least 40% tree canopy cover comprising more than 80% evergreen needleleaf cover                                              | Evergreen Forest             | Areas dominated by trees generally greater than 5 meters tall, and greater than 20% of total vegetation cover. More than 75% of the tree species maintain their leaves all year. Canopy is never without green foliage.                          |
|       | Woody Wetland               | Additional class of wetland that tries to separate wetlands with considerable biomass from mainly herbaceous wetlands                              | Woody Wetlands               | Areas where forest or shrubland vegetation accounts for greater than 20% of vegetative cover and the soil or substrate is periodically saturated with or covered with water.                                                                     |
|       |                             |                                                                                                                                                    | Shrub/Scrub                  | Areas dominated by shrubs; less than 5 meters tall with shrub canopy typically greater than 20% of total vegetation. This class includes true shrubs, young trees in an early successional stage or trees stunted from environmental conditions. |
| Other | Wetland                     | Vegetated land (woody and non-woody) with inundation from high water table; includes swamps, salt and freshwater marshes and tidal rivers/mudflats | Emergent Herbaceous Wetlands | Areas where perennial herbaceous vegetation accounts for greater than 80% of vegetative cover and the soil or substrate is periodically saturated with or covered with water.                                                                    |
|       | Herbaceous / Grassland      | Non-woody naturally occurring or slightly managed plants; includes pastures                                                                        | Barren Land (Rock/Sand/Clay) | Areas of bedrock, desert pavement, scarps, talus, slides, volcanic material, glacial debris, sand dunes, strip mines, gravel pits and other accumulations of earthen material. Generally, vegetation accounts for less than 15% of total cover.  |
|       | Bare                        | Non-vegetated land comprised of above 60% rock, sand, or soil                                                                                      |                              |                                                                                                                                                                                                                                                  |
| Water | Water                       | Lakes, ponds, rivers, and ocean                                                                                                                    | Open Water                   | Areas of open water, generally with less than 25% cover of vegetation or soil.                                                                                                                                                                   |

569

570
